# Supplementary material
Source: publisher figshare collection journal article supplement (https://sage.figshare.com/ndownloader/files/22676507)
Supplement: Supplementary file 1 [file 22676507]

# Dermatology On Call Service

## Question Title

1. What is your specialty

## Question Title

2. What is your level of training (i.e. PGY1, staff physician)

## Question Title

3. How has the lack of dermatology on-call service over the past 3 months negatively affected the care of your patients?

- ☐ To a great extent
- ☐ To a moderate extent
- ☐ To a minimal extent
- ☐ It has had no impact on the care of my patients

## Question Title

4. Over the past 3 months that the dermatology consult service has been unavailable, how many times would you have contacted this service for consultation or advice if it was available?

- ☐ 10 or greater
- ☐ 5 to 10
- ☐ 1 to 5
- ☐ I would not have contacted dermatology on call

## Question Title

5. Over the past 3 months that the dermatology consult service has been unavailable, have you attempted to contact a dermatologist to address questions or input on patient management?

- ☐ More than once
- ☐ Once
- ☐ Never

## Question Title

6. Over the past 3 months that the dermatology consult service has been unavailable, have you performed any clinical work that you otherwise would not have such as a skin biopsy, diagnosis or treatment of skin disease?

- ☐ Yes, at least 10 instances of performing dermatology-related clinical work
- ☐ Yes, 5-10 instances of performing dermatology-related clinical work
- ☐ Yes, 1-5 instances of performing dermatology-related clinical work
- ☐ I have not performed dermatology-related clinical work

**Question Title**

7. What has been your level of comfort with performing this dermatologic clinical work?

- ☐ Very comfortable
- ☐ Moderately comfortable
- ☐ Uncomfortable
- ☐ I did not perform these duties due to lack of comfort

**Question Title**

8. Do you think that a dermatology on-call service is useful?

- ☐ Yes, it is essential.
- ☐ Yes, it is useful.
- ☐ It is not useful to my practice.

**Question Title**

9. Please describe the impact of the call-suspension of dermatology has had, if there has been no impact write "None".

|  |
|--|
|  |
|--|
